# Supplementary material for: E8-LWDS: Factorial Structure and Psychometric Properties of the Lebanese Waterpipe Dependence Scale-11 in 1490 Egyptian Waterpipe Tobacco Smokers—A Critical Approach
Source: MDPI journal article supplement (doi:10.3390/ijerph18136741), 2021-06-23
Supplement: s1 [file s1]

**Supplementary Table S1. The LWDS factor structure in different studies**

| Country where study was conducted                          | Lebanon*                                                                                                          | Iran                                                                                                | Egypt                                                                                                                              | Turkey                                                                                                                                            | Jordan                                                                                  | The United Kingdom                                                          |
|------------------------------------------------------------|-------------------------------------------------------------------------------------------------------------------|-----------------------------------------------------------------------------------------------------|------------------------------------------------------------------------------------------------------------------------------------|---------------------------------------------------------------------------------------------------------------------------------------------------|-----------------------------------------------------------------------------------------|-----------------------------------------------------------------------------|
| Acronym                                                    | LWDS-11                                                                                                           | Not available                                                                                       | E8-LWDS                                                                                                                            | LWDS-TR                                                                                                                                           | LWDS-10J                                                                                | Not available                                                               |
| Analysis methods                                           | EFA                                                                                                               | CFA                                                                                                 | EFA & CFA                                                                                                                          | EFA & CFA                                                                                                                                         | EFA & CFA                                                                               | EFA                                                                         |
| Sample size                                                | 291 (103/188)                                                                                                     | 465                                                                                                 | 1490                                                                                                                               | 401                                                                                                                                               | 2577                                                                                    | 180                                                                         |
| Sample description                                         | Current exclusive waterpipe smokers (>1 waterpipe/2 weeks)<br>Males & females (33.0%/39.9%)<br>Mean age 29.7/36.2 | Current waterpipe smokers (any WTS in past month)<br><br>Males & females (73.7%)<br>Age range 15-54 | Current waterpipe smokers (any WTS in past-30 days)<br>Non-exclusive WTS included<br><br>Males & females (8.7%)<br>Age range 18-87 | Current waterpipe smokers (≥1 waterpipe/2 weeks)<br>Dual waterpipe & cigarette smokers included<br><br>Males & females (28.2%)<br>Age range 18-62 | Ever waterpipe smoker university students<br><br>Males & females (56%)<br>Mean age 21.2 | Waterpipe smokers (any WTS in past year)<br><br>Males only<br>Mean age 29.5 |
| Place of conduction                                        | Urban Beirut cafés                                                                                                | Urban Tehran                                                                                        | Rural Menoufia & urban Cairo cafés, households, workplaces, & universities                                                         | Urban Ankara waterpipe serving establishments & social media                                                                                      | Public & private universities                                                           | Urban London cafés                                                          |
| Sampling method                                            | Convenience/random digital dialing                                                                                | Random                                                                                              | Purposive quota representing national proportions of age, gender, residence, & WTS                                                 | Non-random                                                                                                                                        | Random                                                                                  | Non-random                                                                  |
| Number of factors extracted                                | 4                                                                                                                 | 4                                                                                                   | 3                                                                                                                                  | 2                                                                                                                                                 | 3                                                                                       | 2                                                                           |
| Number of items included                                   | 11                                                                                                                | 11                                                                                                  | 8                                                                                                                                  | 9                                                                                                                                                 | 10                                                                                      | 10                                                                          |
| 1. Number of times you could stop waterpipe for >7 days?   | Physiological nicotine dependence                                                                                 | Physiological nicotine dependence                                                                   | Physical dependence                                                                                                                | Physiological dependence                                                                                                                          | Physical dependence                                                                     | Physiological dependence                                                    |
| 2. Percent of income you would spend on waterpipe smoking? | Physiological nicotine dependence                                                                                 | Physiological nicotine dependence                                                                   | Not included                                                                                                                       | Physiological dependence                                                                                                                          | Physical dependence                                                                     | Physiological dependence                                                    |
| 3. Number of days you could spend without waterpipe?       | Physiological nicotine dependence                                                                                 | Physiological nicotine dependence                                                                   | Physical dependence                                                                                                                | Physiological dependence                                                                                                                          | Physical dependence                                                                     | Physiological dependence                                                    |
| 4. Number of waterpipes you usually smoke per week?        | Physiological nicotine dependence                                                                                 | Physiological nicotine dependence                                                                   | Physical dependence                                                                                                                | Physiological dependence                                                                                                                          | Physical dependence                                                                     | Physiological dependence                                                    |
| 5. Do you smoke waterpipe to relax your nerves?            | Negative reinforcement                                                                                            | Negative reinforcement                                                                              | Psychological dependence                                                                                                           | Psychological dependence                                                                                                                          | Relaxation/ pleasure                                                                    | Post/neg reinforcement                                                      |
| 6. Do you smoke waterpipe to improve your morale?          | Negative reinforcement                                                                                            | Negative reinforcement                                                                              | Psychological dependence                                                                                                           | Psychological dependence                                                                                                                          | Psychosocial                                                                            | Post/neg reinforcement                                                      |
| 7. Do you smoke waterpipe when you are seriously ill?      | Psychological craving                                                                                             | Psychological craving                                                                               | Psychological craving                                                                                                              | Physiological dependence                                                                                                                          | Physical dependence                                                                     | Physiological dependence                                                    |
| 8. Do you smoke waterpipe alone?                           | Psychological craving                                                                                             | Psychological craving                                                                               | Not included                                                                                                                       | Physiological dependence                                                                                                                          | Physical dependence                                                                     | Physiological dependence                                                    |
| 9. Are you ready not to eat in exchange for a waterpipe?   | Psychological craving                                                                                             | Psychological craving                                                                               | Psychological craving                                                                                                              | Physiological dependence                                                                                                                          | Not included                                                                            | Not included                                                                |
| 10. Do you smoke waterpipe for pleasure?                   | Positive reinforcement                                                                                            | Positive reinforcement                                                                              | Psychological Dependence                                                                                                           | Not included                                                                                                                                      | Relaxation/ pleasure                                                                    | Post/neg reinforcement                                                      |
| 11. Do you smoke to please others (conviviality)?          | Positive reinforcement                                                                                            | Positive reinforcement                                                                              | Not included                                                                                                                       | Not included                                                                                                                                      | Psychosocial                                                                            | Post/neg reinforcement                                                      |
| Total scale reliability                                    | 0.83/0.70                                                                                                         | Not applicable                                                                                      | 0.64                                                                                                                               | 0.8                                                                                                                                               | 0.77                                                                                    | 0.74                                                                        |
| Subscale reliability (min, max)                            | 0.55/0.42, 0.88/0.69                                                                                              | Not applicable                                                                                      | 0.65, 0.82                                                                                                                         | 0.81, 0.82                                                                                                                                        | 0.67, 0.75                                                                              | 0.50, 0.80                                                                  |
| Total % of variance explained                              | 68.97/not mentioned                                                                                               | Not applicable                                                                                      | 71.8                                                                                                                               | 59                                                                                                                                                | Not mentioned                                                                           | 47.8                                                                        |

**EFA, Exploratory factor analysis; CFA, Confirmatory factor analysis; WTS, waterpipe tobacco smoking**

\*Sample 1/Sample 3. (%) represent proportion of females in the study sample.

Different cell shade by the same colour (i.e. light and dark blue; light and dark yellow; light and dark gray) indicates different factor labelling or different item subscale assignment.

**Supplementary Table S2. Exploratory factor analysis, factor loadings, and structure of the E8-LWDS among exclusive and non-exclusive current waterpipe smokers**

|    |                                                         |                                               | E8-LWDS factor loadings and subscale assignment in<br>Exclusive WTS (n=777) |        |        |                                        |                                           | E8-LWDS factor loadings and subscale assignment in<br>Non-exclusive WTS (n=713) |        |        |                                        |                                           |
|----|---------------------------------------------------------|-----------------------------------------------|-----------------------------------------------------------------------------|--------|--------|----------------------------------------|-------------------------------------------|---------------------------------------------------------------------------------|--------|--------|----------------------------------------|-------------------------------------------|
|    | Items retained from the original<br>LWDS-11             | LWDS-11<br>original<br>subscale<br>assignment | 1*                                                                          | 2*     | 3*     | Corrected<br>Item-Total<br>Correlation | Cronbach's<br>Alpha if<br>Item<br>Deleted | 1*                                                                              | 2*     | 3*     | Corrected<br>Item-Total<br>Correlation | Cronbach's<br>Alpha if<br>Item<br>Deleted |
| 1  | Number of times you could stop<br>waterpipe for >7 days | 1                                             | 0.846                                                                       |        |        | 0.412                                  | 0.578                                     | 0.814                                                                           |        |        | 0.411                                  | 0.532                                     |
| 3  | Number of days you could<br>spend without waterpipe     | 1                                             | 0.902                                                                       |        |        | 0.419                                  | 0.582                                     | 0.926                                                                           |        |        | 0.423                                  | 0.531                                     |
| 4  | Number of water pipes you<br>usually smoke per week     | 1                                             | 0.854                                                                       |        |        | 0.338                                  | 0.606                                     | 0.885                                                                           |        |        | 0.311                                  | 0.567                                     |
| 5  | Do you smoke waterpipe to<br>relax your nerves          | 2                                             |                                                                             | 0.741  |        | 0.358                                  | 0.596                                     |                                                                                 |        | 0.710  | 0.231                                  | 0.592                                     |
| 6  | Do you smoke waterpipe to<br>improve your morale        | 2                                             |                                                                             | 0.818  |        | 0.386                                  | 0.587                                     |                                                                                 |        | 0.787  | 0.392                                  | 0.536                                     |
| 7  | Do you smoke waterpipe when<br>you are seriously ill    | 3                                             |                                                                             |        | 0.882  | 0.113                                  | 0.651                                     |                                                                                 | 0.924  |        | 0.274                                  | 0.577                                     |
| 9  | Are you ready not to eat in<br>exchange for a waterpipe | 3                                             |                                                                             |        | 0.859  | 0.27                                   | 0.618                                     |                                                                                 | 0.927  |        | 0.268                                  | 0.577                                     |
| 10 | Do you smoke waterpipe for<br>pleasure                  | 4                                             |                                                                             | 0.768  |        | 0.354                                  | 0.596                                     |                                                                                 |        | 0.713  | 0.128                                  | 0.619                                     |
|    | Eigen values                                            |                                               | 2.428                                                                       | 1.790  | 1.445  |                                        |                                           | 2.408                                                                           | 1.891  | 1.475  |                                        |                                           |
|    | % Variance explained by factor                          |                                               | 30.352                                                                      | 22.377 | 18.065 |                                        |                                           | 30.106                                                                          | 23.641 | 18.440 |                                        |                                           |
|    | Total Variance explained by<br>model                    |                                               | 70.794                                                                      |        |        |                                        |                                           | 72.187                                                                          |        |        |                                        |                                           |
|    | Cronbach's alpha for factors                            |                                               | 0.823                                                                       | 0.676  | 0.692  |                                        |                                           | 0.846                                                                           | 0.833  | 0.585  |                                        |                                           |
|    | Cronbach's alpha for total scale                        |                                               | 0.635                                                                       |        |        |                                        |                                           | 0.600                                                                           |        |        |                                        |                                           |

WTS, waterpipe tobacco smoking; Non-exclusive WTS, waterpipe tobacco smoking and/or cigarette smoking and/or electronic nicotine delivery systems use

\* Factor 1: physical dependence, Factor 2: psychological dependence, and Factor 3: psychological craving.

**Supplementary Table S3. Differentiation between exclusive and non-exclusive waterpipe tobacco smokers (median test)**

|                                                        | Total sample (N=1490) |                  | Exclusive WTS (N=777) |                  | Non-exclusive WTS (N=713) |                  |
|--------------------------------------------------------|-----------------------|------------------|-----------------------|------------------|---------------------------|------------------|
|                                                        | Non-heavy smoker      | Heavy smoker     | Non-heavy smoker      | Heavy smoker     | Non-heavy smoker          | Heavy smoker     |
| <b>Hagar (tobacco portion) smoked per day (number)</b> | <b>&lt;8</b>          | <b>≥8</b>        | <b>&lt;8</b>          | <b>≥8</b>        | <b>&lt;8</b>              | <b>≥8</b>        |
|                                                        | <b>n=964</b>          | <b>n=526</b>     | <b>n=476</b>          | <b>n=301</b>     | <b>n=488</b>              | <b>n=223</b>     |
| E8-LWDS mean (SD) <sup>a</sup>                         | 13.0 (4.0)            | 15.2 (2.7)       | 13.2 (3.9)            | 15.4 (2.8)       | 12.8 (4.1)                | 15.0 (2.6)       |
| E8-LWDS median (IQR)                                   | 13.0 (10.0-15.0)      | 15.0 (13.0-17.0) | 13.0 (11.0-15.0)      | 15.0 (13.0-18.0) | 13.0 (10.0-16.0)          | 15.0 (13.0-17.0) |
| Percentage above median hagar/day <sup>b*</sup>        | 35.2                  | 61.8             | 35.1                  | 62.5             | 35.2                      | 61.4             |
| Percentage above E8-LWDS score 14 <sup>c*</sup>        | 45.9                  | 72.4             | 48.3                  | 72.4             | 43.4                      | 72.4             |
|                                                        | Non-heavy smoker      | Heavy smoker     | Non-heavy smoker      | Heavy smoker     | Non-heavy smoker          | Heavy smoker     |
| <b>Waterpipes smoked per week (number)</b>             | <b>&lt;7</b>          | <b>≥7</b>        | <b>&lt;7</b>          | <b>≥7</b>        | <b>&lt;7</b>              | <b>≥7</b>        |
|                                                        | <b>n=279</b>          | <b>n=1211</b>    | <b>n=101</b>          | <b>n=676</b>     | <b>n=178</b>              | <b>n=535</b>     |
| E8-LWDS mean (SD) <sup>a</sup>                         | 9.9 (3.8)             | 14.7 (3.1)       | 9.4 (4.0)             | 14.7 (3.1)       | 10.1 (3.7)                | 14.6 (3.1)       |
| E8-LWDS median (IQR)                                   | 10.0 (7.0-12.0)       | 15.0 (16.0-17.0) | 9.0 (7.0-12.5)        | 15.0 (13.0-17.0) | 10.0 (8.0-12.0)           | 15.0 (12.0-17.0) |
| Percentage above median waterpipes/week <sup>b*</sup>  | 11.1                  | 52.3             | 11.9                  | 50.7             | 10.7                      | 54.2             |
| Percentage above E8-LWDS score 14 <sup>c*</sup>        | 15.4                  | 64.4             | 14.9                  | 64.1             | 15.7                      | 64.9             |

**WTS, waterpipe tobacco smoking; Non-exclusive WT use, waterpipe tobacco smoking and/or cigarette smoking and/or electronic nicotine delivery systems use**

<sup>a</sup> Independent samples T-test

<sup>b</sup> Median nonparametric test

<sup>c</sup> Chi-squared test

\*All p-values were <0.001
